# Supplementary material
Source: publisher figshare collection journal article supplement (https://frontiersin.figshare.com/ndownloader/files/13235510)
Supplement: Supplementary file 1 [file 13235510]

## Sheet: Table S1
		MaxT	Secs300C	IntSecs300C	MassLoss%	CinitRem(%)	Ro%	Ncorrec%	Ccorrec%	Hcorrec%	TotalOMLoss%	T50	Q1	Q2	Q3	T1	T2	T3
MaxT	Pearson Correlation	1	-0.096	0.228	.644**	-.590**	.462*	-0.300895	0.350549	-.486**	0.095	0.374	-0.322	-0.232	0.31	.c	-0.048	0.237
	Sig. (bilateral)		0.608	0.218	0	0.000946359	0.013	0.119731	0.0674167	0.00881914	0.632	0.05	0.095	0.235	0.108	0	0.807	0.224
	N	31	31	31	31	28	28	28	28	28	28	28	28	28	28	28	28	28
Secs300C	Pearson Correlation	-0.096	1	.779**	0.33	-0.343679	0.349	.408*	-0.0722545	-0.160373	-0.066	0.028	-0.144	0.141	-0.029	.c	0.178	-0.093
	Sig. (bilateral)	0.608		0	0.07	0.0733474	0.069	0.0313309	0.714827	0.414945	0.74	0.888	0.466	0.475	0.882	0	0.364	0.637
	N	31	31	31	31	28	28	28	28	28	28	28	28	28	28	28	28	28
IntSecs300C	Pearson Correlation	0.228	.779**	1	.483**	-.452*	.548**	0.00107924	0.168401	-0.32237	0.079	0.216	-0.234	-0.072	0.159	.c	0.136	0.119
	Sig. (bilateral)	0.218	0		0.006	0.0156468	0.003	0.995651	0.391661	0.0943163	0.689	0.27	0.23	0.717	0.418	0	0.491	0.545
	N	31	31	31	31	28	28	28	28	28	28	28	28	28	28	28	28	28
MassLoss%	Pearson Correlation	.644**	0.33	.483**	1	-.972**	-0.148	.381*	-.418**	0.190124	.323*	-.379*	0.269	.384*	-.369*	-0.044	-0.02	-.377*
	Sig. (bilateral)	0	0.07	0.006		2.6751e-24	0.395	0.0182017	0.0090377	0.252906	0.048	0.019	0.102	0.017	0.023	0.792	0.907	0.02
	N	31	31	31	41	38	35	38	38	38	38	38	38	38	38	38	38	38
CinitRem(%)	Pearson Correlation	-.590**	-0.343679	-.452*	-.972**	1	0.0674703	-.350*	.330*	-0.103571	-0.268155	0.288475	-0.172458	-0.31087	0.282401	0.0686421	-0.0236733	0.310622
	Sig. (bilateral)	0.000946359	0.0733474	0.0156468	2.6751e-24		0.709097	0.0311296	0.042876	0.536051	0.103574	0.0790149	0.300494	0.0574744	0.0858248	0.682183	0.887809	0.0576845
	N	28	28	28	38	38	33	38	38	38	38	38	38	38	38	38	38	38
Ro%	Pearson Correlation	.462*	0.349	.548**	-0.148	0.0674703	1	-.380*	.768**	-.785**	-0.207	.722**	-.592**	-.632**	.665**	-0.158	0.035	.682**
	Sig. (bilateral)	0.013	0.069	0.003	0.395	0.709097		0.0291683	1.86066e-07	6.26208e-08	0.247	0	0	0	0	0.38	0.848	0
	N	28	28	28	35	33	35	33	33	33	33	33	33	33	33	33	33	33
Ncorrec%	Pearson Correlation	-0.300895	.408*	0.00107924	.381*	-.350*	-.380*	1	-0.126183	0.239135	-0.0558198	-0.179637	0.0227206	.426**	-0.26505	0.129878	0.0982469	-.398**
	Sig. (bilateral)	0.119731	0.0313309	0.995651	0.0182017	0.0311296	0.0291683		0.398022	0.127202	0.709396	0.226962	0.879511	0.0028426	0.0717796	0.400753	0.525772	0.00748694
	N	28	28	28	38	38	33	47	47	42	47	47	47	47	47	44	44	44
Ccorrec%	Pearson Correlation	0.350549	-0.0722545	0.168401	-.418**	.330*	.768**	-0.126183	1	-.900**	0.0786801	.908**	-.932**	-.728**	.877**	.826**	.740**	.746**
	Sig. (bilateral)	0.0674167	0.714827	0.391661	0.0090377	0.042876	1.86066e-07	0.398022		5.39556e-16	0.5991	1.39242e-18	2.16458e-21	6.60783e-09	6.55165e-16	5.07213e-12	9.39882e-09	6.38623e-09
	N	28	28	28	38	38	33	47	47	42	47	47	47	47	47	44	44	44
Hcorrec%	Pearson Correlation	-.486**	-0.160373	-0.32237	0.190124	-0.103571	-.785**	0.239135	-.900**	1	0.102529	-.856**	.834**	.702**	-.814**	0.244647	-0.0559355	-.786**
	Sig. (bilateral)	0.00881914	0.414945	0.0943163	0.252906	0.536051	6.26208e-08	0.127202	5.39556e-16		0.518202	4.73544e-13	7.25536e-12	2.2152e-07	5.67811e-11	0.133348	0.7352	3.14768e-09
	N	28	28	28	38	38	33	42	42	42	42	42	42	42	42	39	39	39
TotalOMLoss%	Pearson Correlation	0.095	-0.066	0.079	.323*	-0.268155	-0.207	-0.0558198	0.0786801	0.102529	1	-0.241	.417**	0.032	-0.166	0.113	-0.067	-0.08
	Sig. (bilateral)	0.632	0.74	0.689	0.048	0.103574	0.247	0.709396	0.5991	0.518202		0.144	0.009	0.848	0.318	0.499	0.691	0.634
	N	28	28	28	38	38	33	47	47	42	38	38	38	38	38	38	38	38
T50	Pearson Correlation	0.374	0.028	0.216	-.379*	0.288475	.722**	-0.179637	.908**	-.856**	-0.241	1	-.875**	-.944**	.981**	-0.303	0.25	.946**
	Sig. (bilateral)	0.05	0.888	0.27	0.019	0.0790149	0	0.226962	1.39242e-18	4.73544e-13	0.144		0	0	0	0.065	0.13	0
	N	28	28	28	38	38	33	47	47	42	38	38	38	38	38	38	38	38
Q1	Pearson Correlation	-0.322	-0.144	-0.234	0.269	-0.172458	-.592**	0.0227206	-.932**	.834**	.417**	-.875**	1	.732**	-.872**	0.145	-.382*	-.709**
	Sig. (bilateral)	0.095	0.466	0.23	0.102	0.300494	0	0.879511	2.16458e-21	7.25536e-12	0.009	0		0	0	0.387	0.018	0
	N	28	28	28	38	38	33	47	47	42	38	38	38	38	38	38	38	38
Q2	Pearson Correlation	-0.232	0.141	-0.072	.384*	-0.31087	-.632**	.426**	-.728**	.702**	0.032	-.944**	.732**	1	-.972**	0.282	-0.202	-.970**
	Sig. (bilateral)	0.235	0.475	0.717	0.017	0.0574744	0	0.0028426	6.60783e-09	2.2152e-07	0.848	0	0		0	0.086	0.223	0
	N	28	28	28	38	38	33	47	47	42	38	38	38	38	38	38	38	38
Q3	Pearson Correlation	0.31	-0.029	0.159	-.369*	0.282401	.665**	-0.26505	.877**	-.814**	-0.166	.981**	-.872**	-.972**	1	-0.253	0.277	.942**
	Sig. (bilateral)	0.108	0.882	0.418	0.023	0.0858248	0	0.0717796	6.55165e-16	5.67811e-11	0.318	0	0	0		0.125	0.092	0
	N	28	28	28	38	38	33	47	47	42	38	38	38	38	38	38	38	38
T1	Pearson Correlation	.c	.c	.c	-0.044	0.0686421	-0.158	0.129878	.826**	0.244647	0.113	-0.303	0.145	0.282	-0.253	1	-0.027	-.326*
	Sig. (bilateral)	0	0	0	0.792	0.682183	0.38	0.400753	5.07213e-12	0.133348	0.499	0.065	0.387	0.086	0.125		0.872	0.046
	N	28	28	28	38	38	33	44	44	39	38	38	38	38	38	38	38	38
T2	Pearson Correlation	-0.048	0.178	0.136	-0.02	-0.0236733	0.035	0.0982469	.740**	-0.0559355	-0.067	0.25	-.382*	-0.202	0.277	-0.027	1	0.188
	Sig. (bilateral)	0.807	0.364	0.491	0.907	0.887809	0.848	0.525772	9.39882e-09	0.7352	0.691	0.13	0.018	0.223	0.092	0.872		0.258
	N	28	28	28	38	38	33	44	44	39	38	38	38	38	38	38	38	38
T3	Pearson Correlation	0.237	-0.093	0.119	-.377*	0.310622	.682**	-.398**	.746**	-.786**	-0.08	.946**	-.709**	-.970**	.942**	-.326*	0.188	1
	Sig. (bilateral)	0.224	0.637	0.545	0.02	0.0576845	0	0.00748694	6.38623e-09	3.14768e-09	0.634	0	0	0	0	0.046	0.258
	N	28	28	28	38	38	33	44	44	39	38	38	38	38	38	38	38	38
* Significant at the 0.05 level. ** Significant at the 0.01 level.
